# Supplementary material
Source: publisher figshare collection journal article supplement (https://karger.figshare.com/ndownloader/files/12729152)
Supplement: Supplementary file 1 [file 12729152]

**Supplemental Materials**

| **Supplemental Table 1. Multivariable Regression for WFL and BMI Z-Score at Follow-up Excluding Gestational Age <35 Weeks (n=24)** | | | | |
| --- | --- | --- | --- | --- |
|  | **WFL Z-Score** | | **BMI Z-Score** | |
| **Covariate** | **Coefficient (95% CI)** | **p-value** | **Coefficient (95% CI)** | **p-value** |
| Baseline WFL Z-score | 0.64 (0.36-0.93) | *<0.001* | 0.58 (0.34-0.81) | *<0.001* |
| Enteral Nutrition | 0.77 (0.03-1.51) | *0.04* |  | |
| Months of Dextrose | 0.03 (-0.05-0.11) | 0.5 | 0.006 (-0.062-0.075) | 0.9 |
| Gestational age (weeks) |  | | -0.28 (-0.56- -0.01) | *0.046* |
| Constant | 0.03 (-1.04-1.09) | 0.96 | 11.3 (0.64-21.9) | 0.038 |
